# Supplementary material
Source: bioRxiv or medRxiv preprint supplement (https://www.biorxiv.org/highwire/filestream/59325/field_highwire_adjunct_files/2/141127-3.pdf)
Supplement: Supplementary file [file 141127-3.pdf]

### Appendix 3

| <b><i>Mosannona</i></b>                  | Area under the curve (AUC) | Number of unique records |
|------------------------------------------|----------------------------|--------------------------|
| <i>costaricensis</i>                     | 1.000                      | 4                        |
| <i>depressa</i> subsp. <i>abscondita</i> | 1.000                      | 4                        |
| <i>depressa depressa</i>                 | 0.988                      | 145                      |
| <i>discolor</i>                          | 0.994                      | 6                        |
| <i>hypoglauca</i>                        | 0.999                      | 9                        |
| <i>pacifica</i>                          | 1.000                      | 5                        |
| <i>papillosa</i>                         | 0.998                      | 21                       |
| <i>parva</i>                             | 0.995                      | 7                        |
| <i>raimondii</i>                         | 0.993                      | 15                       |
| <i>xanthochlora</i>                      | 0.998                      | 6                        |

| <b><i>Crematosperma</i></b> | Area under the curve (AUC) | Number of unique records |
|-----------------------------|----------------------------|--------------------------|
| <i>brevipes</i>             | 0.986                      | 14                       |
| <i>cauliflorum</i>          | 0.989                      | 28                       |
| <i>gracilipes</i>           | 0.993                      | 38                       |
| <i>leiophyllum</i>          | 0.994                      | 14                       |
| <i>longicuspe</i>           | 0.996                      | 5                        |
| <i>macrocarpum</i>          | 0.999                      | 4                        |
| <i>megalophyllum</i>        | 0.994                      | 44                       |
| <i>microcarpum</i>          | 0.979                      | 21                       |
| <i>monospermum</i>          | 0.957                      | 65                       |
| <i>napoense</i>             | 0.998                      | 10                       |
| <i>novogratense</i>         | 0.999                      | 5                        |
| <i>oblongum</i>             | 0.991                      | 8                        |
| <i>pacificum</i>            | 0.999                      | 5                        |
| <i>panamense</i>            | 0.999                      | 11                       |
| <i>pedunculatum</i>         | 0.996                      | 14                       |
| <i>pendulum</i>             | 0.994                      | 5                        |
| <i>peruvianum</i>           | 0.998                      | 6                        |
| <i>yamyakatense</i>         | 0.998                      | 5                        |
| <i>venezuelanum</i>         | 0.999                      | 4                        |
| <i>spec B</i>               | 0.993                      | 13                       |
